# Supplementary material
Source: PubMed Central journal article supplement (PMC2920806)

## **SUPPLEMENTAL DATA**

**Figure S1. MEOX2 deletion constructs.** *MEOX2* deletions were constructed as illustrated. Each lacks either the N-terminal domain, the homeodomain, or the C-terminal domain. Protein expression and expected molecular weights were verified by Western blot.

**Figure S2. MEOX2 does not coprecipitate with p65 if either the homeodomain nor N-terminal domain are absent.** (C=empty vector control; WT = wild type *MEOX2*.) Cells were transfected with expression constructs for each of the *MEOX2* deletions, after which they were subjected to co-IP as in Figure 3. Deletion of the homeodomain or the N-terminal domain abolished binding of *MEOX2* to p65.

Figure S1

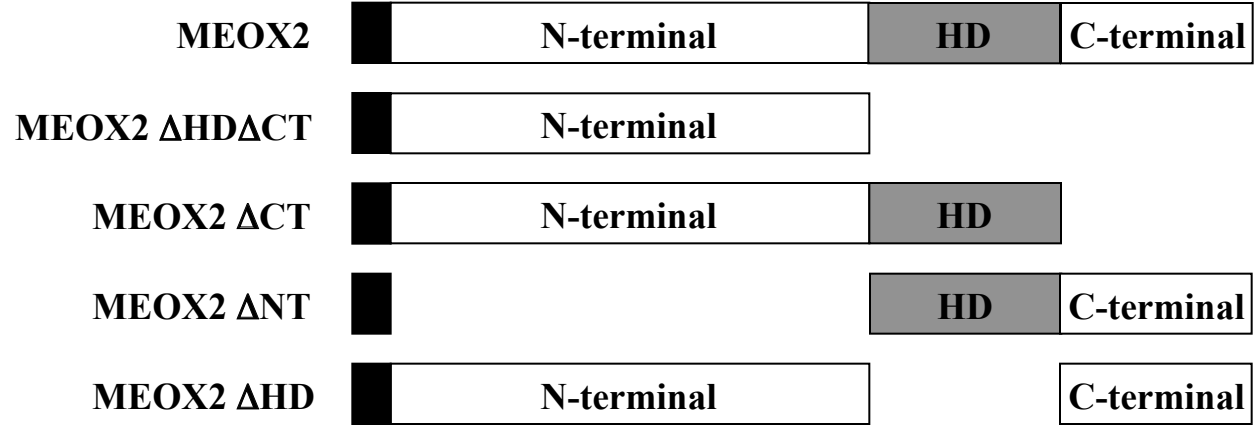

Figure S2

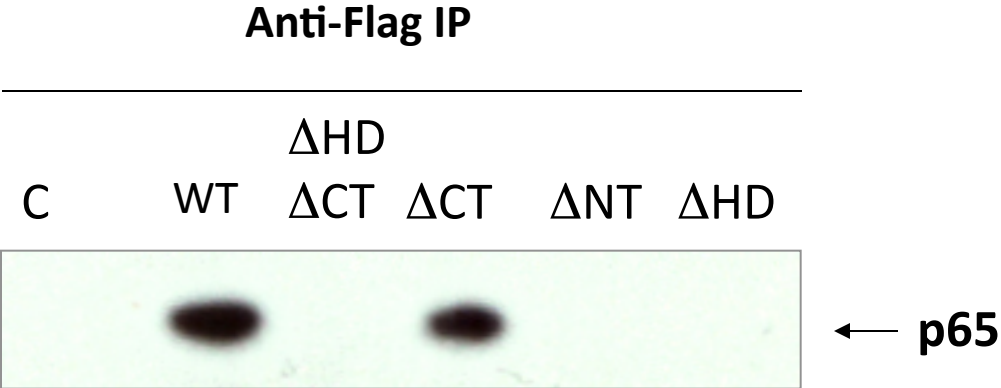

Supplement: supp_cvq117_cvq117supp.pdf [file supp_cvq117_cvq117supp.pdf]
